# Supplementary material for: A novel mechanism of LIN-28 regulation of let-7 microRNA expression revealed by in vivo HITS-CLIP in C. elegans
Source: PubMed Central journal article supplement (PMC4408804; doi:10.1261/rna.045542.114), 2015-05

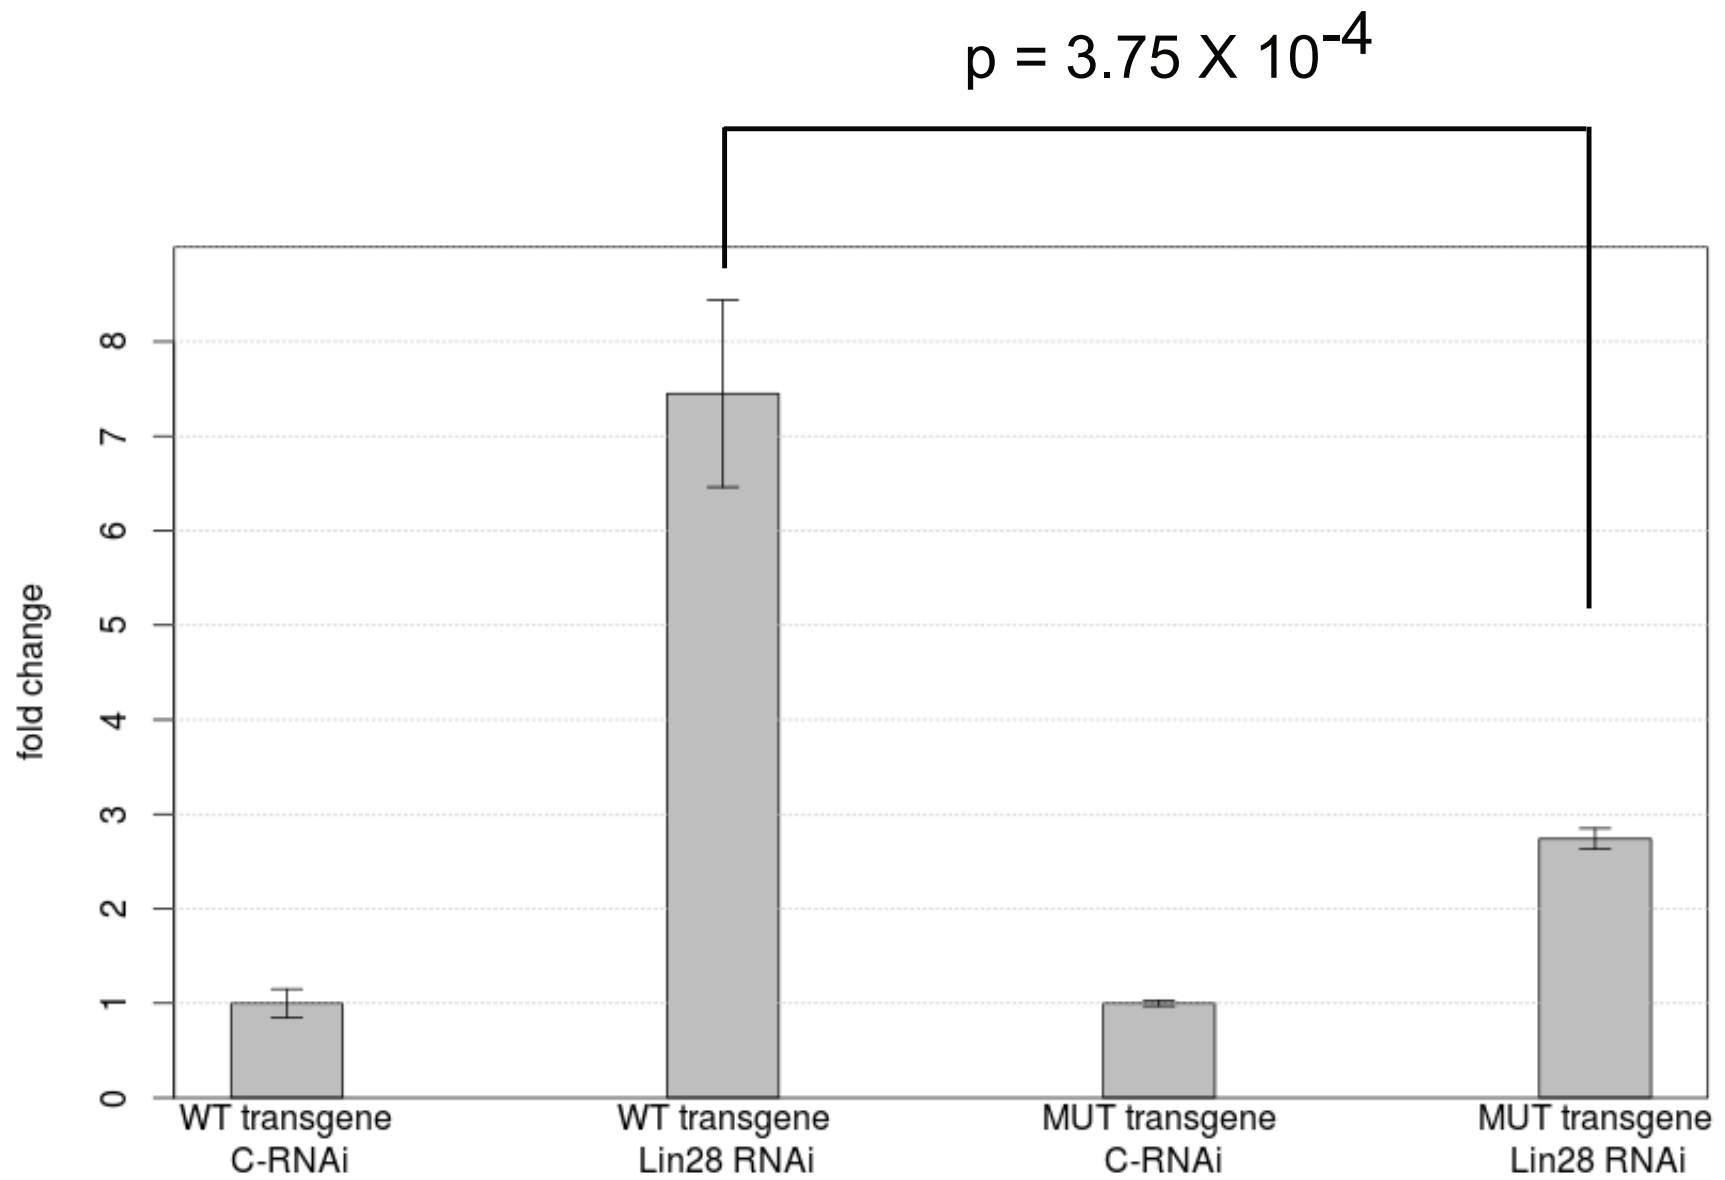

Supplement: supp_045542.114_Fig_S5_cmyk.pdf [file supp_045542.114_Fig_S5_cmyk.pdf]
